# Supplementary material
Source: publisher site journal article supplement (https://neobiota.pensoft.net/article/87474/download/suppl/31/)
Supplement: Supplementary file 1

1 **Supplementary information (SI)**

2 **Recurring infection by crayfish plague pathogen only marginally affects**  
3 **survival and growth of marbled crayfish**

4  
5 Ana Dobrović, Sunčana Geček, Tin Klanjšček, Ines Haberle, Paula Dragičević, Dora Pavić, Ana Petelinec, Ljudevit  
6 Luka Boštjančič, Lena Bonassin, Kathrin Theissinger, Sandra Hudina

7 **Contents**

|    |                                                                                 |           |
|----|---------------------------------------------------------------------------------|-----------|
| 8  | <b>S1 Detection of <i>A. astaci</i> DNA in Experiments 1 and 2</b>              | <b>2</b>  |
| 9  | <b>S2 Primers used for amplification of innate immunity and metabolic genes</b> | <b>3</b>  |
| 10 | <b>S3 Linear multilevel modelling</b>                                           | <b>4</b>  |
| 11 | S3.1 Methods . . . . .                                                          | 4         |
| 12 | S3.2 Results: EXPERIMENT 1 . . . . .                                            | 7         |
| 13 | S3.3 Results: EXPERIMENT 2 . . . . .                                            | 8         |
| 14 | <b>S4 Statistical support for EXPERIMENT 1</b>                                  | <b>11</b> |
| 15 | <b>S5 Statistical support for EXPERIMENT 2</b>                                  | <b>17</b> |

## 16 S1 Detection of *A. astaci* DNA in Experiments 1 and 2

17 Total DNA was isolated from the uropods and/or abdominal cuticle of each crayfish (both euthanized and those  
18 that died during the experiment) using the modified standard NucleoSpin<sup>®</sup> Microbial DNA kit protocol (Macherey  
19 Nagel, Germany). Cuticle samples were lysed by agitation on a Vortex Mixer (Corning, USA) for 30 min (medium  
20 strength), using Macherey Nagel Bead Tubes Type B provided in the kit. To increase the concentration of the final  
21 sample, initial 100  $\mu$ l DNA eluate was used for a second elution from the column. The quality of the isolated DNA  
22 was tested by electrophoresis in 1% agarose gel.

23 The detection of pathogen DNA in the crayfish cuticle was performed by PCR-based assay using the specific  
24 primers 42 (5' GCT TGT GCT GAG GAT GTTCT 3') and 640 (5' CTA TCC GAC TCC GCA TTC TG 3') which  
25 amplify the ITS (Internal Transcribed Spacer) region of the *A. astaci* 5.8 rRNA gene, were used (Oidtmann et al.,  
26 2006). Amplification success, i.e. presence or absence of fragment of expected size (569 bp) was tested using 2%  
27 agarose gel electrophoresis.

## S2 Primers used for amplification of innate immunity and metabolic genes

Table S2.1: Primers for the amplification of innate immunity and metabolic genes. ProPO - prophenoloxidase, C/EBP- $\beta$  - CCAAT/enhancer-binding protein beta, EF1 $\alpha$  - Elongation factor 1- $\alpha$ , GAPDH - Glyceraldehyde 3-phosphate dehydrogenase, CS - citrate synthase.

| Primer name       | Sequence (5'-3')       | Length | Tm    | GC%   | Prod.<br>Len. | Primer<br>efficiency (%) |
|-------------------|------------------------|--------|-------|-------|---------------|--------------------------|
| ProPO-F           | ACTGGCATCTCGTTTACCCC   | 20     | 59.75 | 55    | 98            | 96                       |
| ProPO-R           | GTCGTACCTAGCGACCATCTG  | 21     | 60    | 57.14 |               |                          |
| C/EBP- $\beta$ -F | AGTGGTTGAAAGGCACGACG   | 20     | 61.16 | 55    | 99            | 108                      |
| C/EBP- $\beta$ -R | AAACGCCAGCTCCGTACC     | 18     | 60.05 | 61.11 |               |                          |
| EF1 $\alpha$ -F   | CTGGTACTGGAGAGTTTGAAGC | 22     | 58.67 | 50    | 99            | 90                       |
| EF1 $\alpha$ -R   | CAACAACGAGCTGCTTGAC    | 19     | 57.56 | 52.63 |               |                          |
| GAPDH-F           | GCCACCCAGAAAACCTGTTGA  | 20     | 58.6  | 50    | 100           | 106                      |
| GAPDH-R           | CCTTAGCAGCACCAGTGGAA   | 20     | 59.96 | 55    |               |                          |
| CS-F              | ACCTCACAATTACAGTGACCA  | 22     | 59.83 | 45.45 | 102           | 108                      |
| CS-R              | CAGCAGCAAATGCGAGGTA    | 19     | 58.53 | 52.63 |               |                          |

### 30 S3 Linear multilevel modelling

31 The technique of multilevel modeling (MLM) was used for data analysis (Monsalves et al., 2020; Peugh, 2010) to  
 32 provide answers to growth-related research questions: (a) what average growth trajectory best describes the rate  
 33 of growth over time for all crayfish, (b) what is the variability in growth rates across crayfish, and finally (c) do *A.*  
 34 *astaci* infection and food availability explain variability in growth rates?

#### 35 S3.1 Methods

36 Linear multilevel modelling (MLM) with two levels (Table S3.1) was used to estimate random and fixed rates of  
 37 weight and length gain over time, and to assess the influence of predictors, such as food availability and *A. astaci*  
 38 zoospore concentration, on crayfish growth. Multilevel models are conceptually similar to regressions. However,  
 39 in ordinary regressions the parameters (intercept and slope) are generally fixed values estimated from the sample  
 40 (fixed effect), whereas in multilevel models the parameters may vary due to inter-individual differences (random  
 41 effect).

Table S3.1: Summary of data and variables at two levels in this study design.

| Level | Subindex                            | Independent<br>variables | Dependant<br>variables                                   |
|-------|-------------------------------------|--------------------------|----------------------------------------------------------|
| 1     | timepoint $t = 0, 1, 2, \dots, n^*$ | $TIME_{ti}$              | $Y_{ti}^1 = \text{WEIGHT}$<br>$Y_{ti}^2 = \text{LENGTH}$ |
| 2     | individua $i = 1, 2, \dots, m^{**}$ | $PLAGUE_i$<br>$FOOD_i$   |                                                          |

\*  $n = 9$  (Experiment 1); 6 (Experiment 2)

\*\*  $m = 55$  (Experiment 1); 60 (Experiment 2)

42 MLM framework used in this study is a family of three nested models for Experiment 1 and four nested models  
 43 for Experiment 2. In the model selection procedure for Experiment 1, we first start with the simplest form of the  
 44 model with fixed and random intercepts (unconditional means model, Model 1). In each advanced version of the  
 45 model, a new aspect is added to the model, such as fixed and random slope (Model 2) and conditional growth  
 46 due to *A. astaci* infection (Model 3). Each new model is compared with the previous model to evaluate the better  
 47 model fit, i.e., to assess the contribution of the added aspect to the model through ANOVA, using the most common  
 48 statistics such as the chi-square likelihood ratio test ( $\chi^2$ ), the Akaike information criterion (AIC), and the Bayesian  
 49 information criterion (BIC). The first two steps in model selection procedure in Experiment 2 were similar to those  
 50 in Experiment 1. Additionally, in Experiment 2, Model 3 captures conditional growth due to food availability, and  
 51 Model 4 captures conditional growth due to food availability and *A. astaci* infection.



MLM models were built using the *lme4* package (optimizer: *bobyqa*) in R (Bates et al., 2015). A detailed specification of all data levels, model variables, and model equations is provided below.

**Model 1:** The simplest model used in this study is *Unconditional means model* (null-model)

$$\text{Level 1 : } Y_{ti} = \beta_{0i} + r_{ti} \quad (1)$$

$$\text{Level 2 : } \beta_{0i} = \gamma_{00} + u_{0i} \quad (2)$$

where for each crayfish  $i$ , the observed size in time  $t$  is modeled as the sum of mean size during the growth ( $\beta_{0i}$ ) and residual  $r_{ti}$  that reflects the differences between observed and predicted size during the growth. Each individual's mean size during the growth ( $\beta_{0i}$ ) is modelled as mean size of all crayfish ( $\gamma_{00}$ ; fixed effect) and term  $u_{0i}$  (random effect) that reflects deviations of individual's mean size around grand-mean  $\gamma_{00}$ . Combined equations (1) and (2) yield the following form of the model:

$$Y_{ti} = \gamma_{00} + u_{0i} + r_{ti}. \quad (3)$$

The slope of this linear model is zero.

**Model 2:** Adding the predictor *TIME* to Model 1 allows us to predict the growth trajectory with a line whose slope can be different from zero:

$$\text{Level 1 : } Y_{ti} = \beta_{0i} + \beta_{1i}TIME_{ti} + r_{ti} \quad (4)$$

$$\text{Level 2 : } \beta_{0i} = \gamma_{00} + u_{0i} \quad (5)$$

$$\text{Level 2 : } \beta_{1i} = \gamma_{10} + u_{1i}. \quad (6)$$

The interpretation of model parameters is changed with respect to the Model 1:  $\beta_{0i}$  now reflects initial size of crayfish at time  $t = 0$ , while intercept  $\gamma_{00}$  represents grand mean of all crayfish at time  $t = 0$ . New term  $\beta_{1i}$  reflects how each individual's size changes over time and it is modelled as grand-mean rate of growth in time (slope) of all crayfish  $\gamma_{10}$  and residual term  $u_{1i}$  that reflects individual crayfish differences in size change around the grand-mean. Combined equations (4), (5) and (6) form the model:

$$Y_{ti} = \gamma_{00} + \gamma_{10}TIME_{ti} + u_{0i} + u_{1i}TIME_{ti} + r_{ti} \quad (7)$$

Parameters  $\beta_{0i}$  and  $\beta_{1i}$  estimate fixed effects, while parameters  $u_{0i}$  and  $u_{1i}$  estimate random effect.

**Model 3A:** Model 3A is conditional model where predictor variable *PLAGUE* is added to Model 2 to explain intercept and slope variance:

$$\text{Level 1 : } Y_{ti} = \beta_{0i} + \beta_{1i}TIME_{ti} + r_{ti} \quad (8)$$

$$\text{Level 2 : } \beta_{0i} = \gamma_{00} + \gamma_{01}PLAGUE_i + u_{0i} \quad (9)$$

$$\text{Level 2 : } \beta_{1i} = \gamma_{10} + \gamma_{11}PLAGUE_i + u_{1i} \quad (10)$$

Adding categorical predictor variable changes interpretation of  $\gamma_{00}$  and  $\gamma_{10}$  parameters. Since **R** defaults to the dummy coding system of the categorical variable *PLAGUE*,  $\gamma_{00}$  represents the mean size of crayfish in the Control group at time  $t = 0$ , while  $\gamma_{00} + \gamma_{01}^{(7500)}$  and  $\gamma_{00} + \gamma_{01}^{(15000)}$  represent mean size of crayfish in two infected groups in Experiment 1 at time  $t = 0$ . Similarly,  $\gamma_{10}$  represents the the mean slope of size growth in the Control group, while  $\gamma_{10} + \gamma_{11}^{(7500)}$  and  $\gamma_{10} + \gamma_{11}^{(15000)}$  represent the mean slope of size growth in infected groups, respectively. Equations (8), (9) and (10) yield the following combined model equation:

$$Y_{ti} = \gamma_{00} + \gamma_{01}PLAGUE_i + \gamma_{10}TIME_{ti} + \gamma_{11}PLAGUE_i \cdot TIME_{ti} + u_{0i} + u_{1i}TIME_{ti} + r_{ti}, \quad (11)$$

where  $\gamma_{00}$ ,  $\gamma_{01}$ ,  $\gamma_{10}$  and  $\gamma_{11}$  are fixed effect parameters, while  $u_{0i}$  and  $u_{1i}$  are random effects parameters that reflect individual crayfish differences.

**Model 3B:** Model 3B is version of Model 3A in which the 3-level variable *PLAGUE* is replaced by the 2-level variable *FOOD*.

**Model 4:** The most complex in this family of models is Model 4, in which the predictor variable *PLAGUE* is added to Model 3B. Since one of the study objectives was to investigate the interaction between food and infection on the growth of crayfish, the mathematical interaction term between *FOOD* and *PLAGUE* is also added to the model equations:

$$\text{Level 1 : } Y_{ti} = \beta_{0i} + \beta_{1i}TIME_{ti} + r_{ti} \quad (12)$$

$$\text{Level 2 : } \beta_{0i} = \gamma_{00} + \gamma_{01}PLAGUE_i + \gamma_{02}FOOD_i + \gamma_{03}PLAGUE_i \cdot FOOD_i + u_{0i} \quad (13)$$

$$\text{Level 2 : } \beta_{1i} = \gamma_{10} + \gamma_{11}PLAGUE_i + \gamma_{12}FOOD_i + \gamma_{13}PLAGUE_i \cdot FOOD_i + u_{1i} \quad (14)$$

85 The final form of Model 4 is obtained by joining the equations (12), (13) and (14):

$$\begin{aligned}
Y_{ti} = & \gamma_{00} + \gamma_{01}PLAGUE_i + \gamma_{02}FOOD_i + \gamma_{10}TIME_{ti} + \\
& + \gamma_{11}PLAGUE_i \cdot TIME_{ti} + \gamma_{12}FOOD_i \cdot TIME_{ti} + \gamma_{03}PLAGUE_i \cdot FOOD_i + \\
& + \gamma_{13}PLAGUE_i \cdot FOOD_i \cdot TIME_{ti} + u_{0i} + u_{1i}TIME_{ti} + r_{ti}.
\end{aligned} \tag{15}$$

86 The random effects used in Models 1-4 are assumed to be normally distributed and independent from the error  
87 distribution. The variance of the  $r_{ti}$  is denoted by  $\sigma^2$ , the variance of the  $u_{0i}$  is denoted by  $\tau_{00}$  and the variance of  
88 the  $u_{1i}$  is denoted by  $\tau_{11}$ . Finally, nested models used in the data analysis are:

---

|               |         |         |          |         |
|---------------|---------|---------|----------|---------|
| EXPERIMENT 1: | Model 1 | Model 2 | Model 3A |         |
| EXPERIMENT 2: | Model 1 | Model 2 | Model 3B | Model 4 |

---

## 90 S3.2 Results: EXPERIMENT 1

91 **Rate of growth** All three nested MLM models - (i) unconditional means model (Model 1, null- model), (ii) linear  
92 growth model with random slope and intercept (Model 2, intermediate model), and (iii) conditional growth model  
93 (Model 3A, final model) - were built upon the longitudinal data-set on weight and length measured in Experiment  
94 1. The model selection procedure of ANOVA detected an increase in model predictability with each added feature,  
95 and identified Model 3 to have the best model structure in terms of the obtained goodness of fit value and the  
96 number of model parameters used (Table S3.2, Table S4.2 A).

97 The assessment of fixed effects in the Model 3 (Table S3.2; Table S4.2 BC) showed that there was no significant  
98 difference in weight between the groups at the beginning of the experiment. This is due to  $\gamma_{01}$  levels which are  
99 found not to be significant, despite the fact that intercept values for the 7500-group and the 15000-group ( $\gamma_{00} +$   
100  $\gamma_{01} = 136.6$  and  $160.5$  mg, respectively) differed slightly from the mean weight value of the control group ( $\gamma_{00} =$   
101  $155.7$  mg) at the start of experiment (Figure 2B). Weight increased significantly in all groups, but at different rates.  
102 Due to significant interaction term ( $\gamma_{11}$ ), the growth rate (i.e., the slope coefficient) of the control group  $\gamma_{10} =$   
103  $12.7$  mg/wk was significantly higher than the growth rates in the 7500-group and the 1500-group ( $\gamma_{10} + \gamma_{11} = 10.2$   
104  $mg/wk$  and  $9.5$  mg/wk, respectively), indicating a significant effect of *A. astaci* infection on growth rate. Variance  
105 component estimates showed (Table S3.2; Table S4.2 D): significant variance of observed versus predicted growth  
106 within crayfish ( $\sigma^2 = 313.8$  mg<sup>2</sup>), significant variance of weight at start ( $\tau_{00} = 2040.0$  mg<sup>2</sup>), small - but significant

Table S3.2: Summary of nested multilevel regression models (MLMs) for the crayfish growth in Experiment 1. Model structures are given in SI Section C, values in parentheses represent 95% confidence intervals (CIs), and bold values denote statistical significance of fixed effects at  $p < 0.001$ . For a detailed statistical analysis of model selection, goodness of fit, and significance of model parameters, see Table S4.2 and Figure S4.2.

|                                                   |                                  | Model 1                     | Model 2                     | Model 3                     |
|---------------------------------------------------|----------------------------------|-----------------------------|-----------------------------|-----------------------------|
| Parameters                                        |                                  | Value of category (95% CI)  |                             |                             |
| Regression coefficients (fixed effects)           |                                  |                             |                             |                             |
| A                                                 | Intercept ( $\gamma_{00}$ )      | <b>234.8</b> (221.6, 247.7) | <b>150.3</b> (137.5, 163.2) | <b>155.7</b> (131.8, 179.6) |
| B                                                 | Time ( $\gamma_{10}$ )           | -                           | <b>10.7</b> (10.1, 11.2)    | <b>12.7</b> (11.9, 13.4)    |
| C                                                 | Plague ( $\gamma_{01}$ )         |                             |                             |                             |
|                                                   | Control                          | -                           | -                           | <i>Reference A</i>          |
|                                                   | 7500                             | -                           | -                           | -19.1 (-50.7, 12.5)         |
|                                                   | 15000                            | -                           | -                           | 4.8 (-26.9, 36.4)           |
| D                                                 | Interaction ( $\gamma_{11}$ )    |                             |                             |                             |
|                                                   | Time:Control                     | -                           | -                           | <i>Reference B</i>          |
|                                                   | Time:7500                        | -                           | -                           | <b>-2.5</b> (-3.5, -1.5)    |
|                                                   | Time:15000                       | -                           | -                           | <b>-3.2</b> (-4.2, -2.2)    |
| Variance components (random effects) <sup>a</sup> |                                  |                             |                             |                             |
|                                                   | Residual ( $\sigma$ )            | 64.9 (60.7, 69.6)           | 17.7 (16.5, 19.1)           | 17.7 (16.5, 19.1)           |
|                                                   | Intercept ( $\sqrt{\tau_{00}}$ ) | 42.6 (33.1, 55.0)           | 46.5 (38.6, 57.3)           | 45.2 (37.4, 55.7)           |
|                                                   | Slope ( $\sqrt{\tau_{11}}$ )     | -                           | 1.7 (1.3, 2.2)              | 1.0 (0.5, 1.4)              |
|                                                   | Correlation                      | -                           | -0.36 (-0.61, -0.04)        | -0.58 (-0.85, -0.22)        |
| Model summary                                     |                                  |                             |                             |                             |
|                                                   | ICC <sup>b</sup>                 | 0.30                        | 0.87                        | 0.87                        |
|                                                   | LogLik <sup>b</sup>              | -2636.1                     | -2130.9                     | -2109.6                     |
|                                                   | Deviance                         | 5272.2                      | 4261.7                      | 4219.2                      |
|                                                   | AIC <sup>b</sup>                 | 5278.2                      | 4273.7                      | 4239.2                      |
|                                                   | BIC <sup>b</sup>                 | 5290.6                      | 4298.5                      | 4280.6                      |

<sup>a</sup> Variance components are given in the square-rooted form

<sup>b</sup> Intralevel correlation coefficient (ICC), Log-likelihood (LogLik), Akaike information criterion (AIC), Bayesian information criterion (BIC)

107 slope variance across crayfish ( $\tau_{11} = 1.0 \text{ mg}^2\text{wk}^{-2}$ ), and a negative covariance relationship between intercept and  
108 slope.

### 109 S3.3 Results: EXPERIMENT 2

110 **Rate of growth** The set of four nested models - (1) unconditional means model (Model 1, null-model); (2) linear  
111 growth model with random slope and intercept (Model 2); (3) linear growth model conditional on food (Model 3B);  
112 and (4) linear growth model conditional on food and *A. astaci* infection (Model 4) - were compared by ANOVA to  
113 confirm that each additional variable contributed to the predictive ability of the model. Model 4 was identified to  
114 have the best model structure in terms of the goodness-of-fit value obtained and the number of model parameters

115 used (Table S3.3, Table S5.2 A.)

116 The fixed-effects assessment in the Model 4 (Table S3.3; Table S5.2 BC) showed no significant difference in weight  
117 between groups at the beginning of the experiment (see also Figure 3B). This is due to the statistical insignificance  
118 of the main effects of food ( $\gamma_{01}$ ), infection ( $\gamma_{02}$ ), and food:infection interaction ( $\gamma_{03}$ ) in the model (Table S3.3). This  
119 result is consistent with the randomized design of the groups at the start of experiment, which were characterized  
120 by the similar size distribution of crayfish.

121 The effects of food and *A. astaci* infection became significant when combined with time (Table S3.3; Table S5.2  
122 BC) resulting in the significantly different growth rates (i.e., linear slopes) under different experimental conditions.  
123 The effect of food on growth rate was stronger than the effect of *A. astaci* infection: the average growth rate  
124 of control (non-infected) crayfish fed five times a week was 30.8 mg/wk ( $\gamma_{10}$ ), compared with an average growth  
125 rate of 21.0 mg/wk ( $\gamma_{10} + \gamma_{12}$ ) for infected crayfish under the same feeding regime and average growth rate of 2.5  
126 mg/wk for food-restricted control crayfish group ( $\gamma_{10} + \gamma_{11}$ ). The average growth rate of infected food-restricted  
127 individuals was 0.2 mg/wk ( $\gamma_{10} + \gamma_{11} + \gamma_{12} + \gamma_{13}$ ). The decrease in growth rate due to infection was higher when  
128 food was abundant (i.e., feeding regime five times per week;  $\gamma_{12}$ ) than when food was restricted (i.e., feeding once  
129 a week;  $\gamma_{12} + \gamma_{13}$ ), due to a significant three-way interaction term between time, food and *A. astaci* infection ( $\gamma_{13}$ ).  
130 Variance component estimates showed (Table S3.3; Table S5.2 D): significant variance of observed versus predicted  
131 growth within crayfish ( $\sigma^2 = 509.5 \text{ mg}^2$ ), significant variance of weight between crayfish at the start of experiment  
132 ( $\tau_{00} = 9550.9 \text{ mg}^2$ ) and small - but significant - slope variance across crayfish ( $\tau_{11} = 6.1 \text{ mg}^2 \text{wk}^{-2}$ ).

Table S3.3: Summary of nested multilevel regression models (MLMs) for the crayfish growth in Experiment 2. Model structures are given in SI Section C, values in parentheses represent 95% confidence intervals (CIs) and bold values denote statistical significance of fixed effects at  $p < 0.001$ . For a detailed statistical analysis of model selection, goodness of fit, and significance of model parameters, see Table S5.2 and Figure S5.2.

|                                                   |                                    | Model 1                     | Model 2                     | Model 3                     | Model 4                     |
|---------------------------------------------------|------------------------------------|-----------------------------|-----------------------------|-----------------------------|-----------------------------|
| Parameters                                        |                                    | Value of category (95% CI)  |                             |                             |                             |
| Regression coefficients (fixed effects)           |                                    |                             |                             |                             |                             |
| A                                                 | Intercept ( $\gamma_{00}$ )        | <b>349.5</b> (320.1, 378.5) | <b>283.8</b> (258.1, 309.5) | <b>277.0</b> (240.9, 313.2) | <b>276.8</b> (225.8, 327.7) |
| B                                                 | Time ( $\gamma_{10}$ )             | -                           | <b>14.2</b> (10.5, 17.9)    | <b>26.5</b> (24.5, 28.5)    | <b>30.8</b> (28.9, 32.7)    |
| C                                                 | Food ( $\gamma_{01}$ )             |                             |                             |                             |                             |
|                                                   | 5x wk                              | -                           | -                           | <i>Reference A</i>          | <i>Reference A</i>          |
|                                                   | 1x wk                              | -                           | -                           | 14.3 (-36.9, 65.4)          | 17.7 (-54.4, 89.7)          |
| D                                                 | Plague ( $\gamma_{02}$ )           |                             |                             |                             |                             |
|                                                   | Control                            | -                           | -                           | -                           | <i>Reference A</i>          |
|                                                   | 15000                              | -                           | -                           | -                           | 1.0 (-71.1, 73.1)           |
| E                                                 | Time*Food ( $\gamma_{11}$ )        |                             |                             |                             |                             |
|                                                   | Time:5x wk                         | -                           | -                           | <i>Reference B</i>          | <i>Reference B</i>          |
|                                                   | Time:1x wk                         | -                           | -                           | <b>-24.8</b> (-27.7, -21.9) | <b>-28.3</b> (-31.0, -25.7) |
| F                                                 | Time*Plague ( $\gamma_{12}$ )      |                             |                             |                             |                             |
|                                                   | Time:Control                       | -                           | -                           | -                           | <i>Reference B</i>          |
|                                                   | Time:15000                         | -                           | -                           | -                           | <b>-9.8</b> (-12.6, -6.9)   |
| G                                                 | Food*Plague ( $\gamma_{03}$ )      |                             |                             |                             |                             |
|                                                   | 5x wk:Control                      | -                           | -                           | -                           | <i>Reference A/C/D</i>      |
|                                                   | 5x wk:15000                        | -                           | -                           | -                           | <i>Reference A/C/D</i>      |
|                                                   | 1x wk:Control                      | -                           | -                           | -                           | <i>Reference A/C/D</i>      |
|                                                   | 1x wk:15000                        | -                           | -                           | -                           | -6.6 (-108.6, 95.4)         |
| H                                                 | Time*Food*Plague ( $\gamma_{13}$ ) |                             |                             |                             |                             |
|                                                   | Time:5x wk:Control                 | -                           | -                           | -                           | <i>Reference B/E/F</i>      |
|                                                   | Time:5x wk:15000                   | -                           | -                           | -                           | <i>Reference B/E/F</i>      |
|                                                   | Time:1x wk:Control                 | -                           | -                           | -                           | <i>Reference B/E/F</i>      |
|                                                   | Time:1x wk:15000                   | -                           | -                           | -                           | <b>7.5</b> (3.4, 11.6)      |
| Variance components (random effects) <sup>a</sup> |                                    |                             |                             |                             |                             |
|                                                   | Residual ( $\sigma$ )              | 76.0 (69.9, 83.0)           | 22.2 (20.2, 24.5)           | 22.6 (20.6, 24.9)           | 22.6 (20.6, 24.9)           |
|                                                   | Intercept ( $\sqrt{\tau_{00}}$ )   | 107.8 (88.9, 132.7)         | 98.5 (82.76, 119.7)         | 98.0 (82.3, 119.1)          | 97.7 (82.1, 118.7)          |
|                                                   | Slope ( $\sqrt{\tau_{11}}$ )       | -                           | 13.4 (11.1, 16.6)           | 4.4 (3.4, 5.8)              | 2.5 (1.3, 3.6)              |
|                                                   | Correlation                        | -                           | -0.17 (-0.41, 0.10)         | -0.27 (-0.53, 0.04)         | -0.37 (-0.69, 0.03)         |
| Model summary                                     |                                    |                             |                             |                             |                             |
|                                                   | ICC <sup>b</sup>                   | 0.67                        | 0.95                        | 0.95                        | 0.95                        |
|                                                   | LogLik <sup>b</sup>                | -1923.9                     | -1678.6                     | -1628.9                     | -1609.8                     |
|                                                   | Deviance                           | 3847.8                      | 3357.2                      | 3257.8                      | 3219.6                      |
|                                                   | AIC <sup>b</sup>                   | 3853.8                      | 3369.2                      | 3273.8                      | 3243.6                      |
|                                                   | BIC <sup>b</sup>                   | 3865.1                      | 3391.9                      | 3304.0                      | 3288.9                      |

<sup>a</sup> Variance components are given in the square-rooted form

<sup>b</sup> Intralevel correlation coefficient (ICC), Log-likelihood (LogLik), Akaike information criterion (AIC), Bayesian information criterion (BIC)

## 133 S4 Statistical support for EXPERIMENT 1

Table S4.1: Descriptive statistics (panels A/B), results of robust ANOVA (C/D), and post-hoc testing (E/F) for response variables in Experiment 1: **weight/length**.

### Descriptive statistics

#### A Response: WEIGHT (mg)

|         | N  | dead | alive | min   | max   | range | median | mean  | SE  | CI(95%) | var    | std  | coef.var |
|---------|----|------|-------|-------|-------|-------|--------|-------|-----|---------|--------|------|----------|
| Control | 15 | 0    | 15    | 179.5 | 291.8 | 112.3 | 233.4  | 234.1 | 8.4 | 18.1    | 1064.7 | 32.6 | 0.1      |
| 7500    | 20 | 3    | 17    | 138.4 | 231.4 | 93.0  | 194.7  | 187.7 | 6.4 | 13.5    | 688.4  | 26.2 | 0.1      |
| 15000   | 20 | 4    | 16    | 92.9  | 238.9 | 146.0 | 180.7  | 171.8 | 9.2 | 19.6    | 1355.7 | 36.8 | 0.2      |

#### B Response: LENGTH (mm)

|         | N  | dead | alive | min  | max   | range | median | mean | SE   | CI(95%) | var  | std  | coef.var |
|---------|----|------|-------|------|-------|-------|--------|------|------|---------|------|------|----------|
| Control | 15 | 0    | 15    | 5.08 | 10.39 | 5.31  | 8.30   | 7.96 | 0.37 | 0.79    | 2.01 | 1.42 | 0.18     |
| 7500    | 20 | 3    | 17    | 3.74 | 9.32  | 5.58  | 7.67   | 7.39 | 0.36 | 0.76    | 2.18 | 1.48 | 0.20     |
| 15000   | 20 | 4    | 16    | 2.88 | 8.95  | 6.07  | 6.98   | 6.44 | 0.46 | 0.98    | 3.40 | 1.84 | 0.29     |

### Robust ANOVA

#### A heteroscedastic one-way ANOVA based on trimmed means (20% trimming level)

Mair & Wilcox (2020); Wilcox (2012)

#### C Response: WEIGHT (mg)

Test statistic:  $F = 10.0385$   
 Degrees of freedom 1: 2  
 Degrees of freedom 2: 17.06  
 p-value: 0.00131

Explanatory measure of effect size: 0.84  
 Bootstrap CI: [0.64; 1.11]

#### D Response: LENGTH (mm)

Test statistic:  $F = 1.8618$   
 Degrees of freedom 1: 2  
 Degrees of freedom 2: 17.19  
 p-value: 0.1854

Explanatory measure of effect size: 0.49  
 Bootstrap CI: [0.14; 0.92]

### Robust post-hoc tests

#### Inference for all pairwise comparisons

Mair & Wilcox (2020); Wilcox (2012)

#### E Response: WEIGHT (mg)

|                   | psihat   | ci.lower  | ci.upper | p.value |
|-------------------|----------|-----------|----------|---------|
| Control vs. 7500  | 42.74141 | 9.45827   | 76.02456 | 0.00754 |
| Control vs. 15000 | 57.03778 | 23.43251  | 90.64304 | 0.00122 |
| 7500 vs. 15000    | 14.29636 | -12.21025 | 40.80298 | 0.17609 |

#### F Response: LENGTH (mm)

|                   | psihat  | ci.lower | ci.upper | p.value |
|-------------------|---------|----------|----------|---------|
| Control vs. 750   | 0.33616 | -1.08058 | 1.75289  | 0.53909 |
| Control vs. 15000 | 1.24299 | -0.45725 | 2.94323  | 0.21282 |
| 7500 vs. 15000    | 0.90683 | -0.67512 | 2.48878  | 0.29707 |

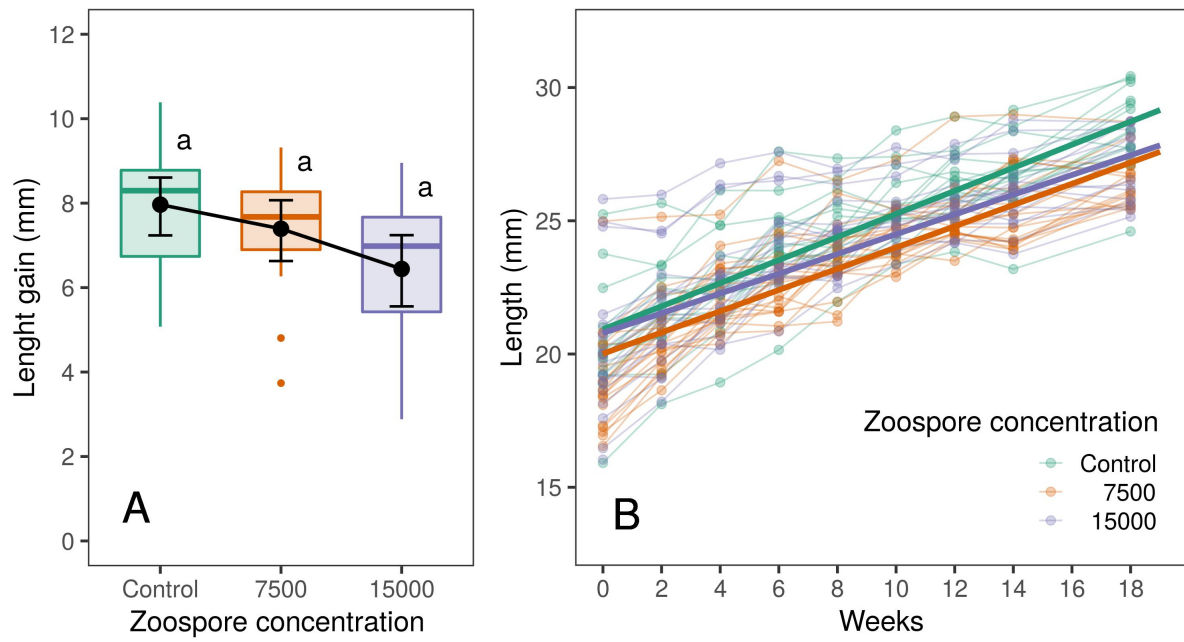

Figure S4.1: Effects of repeated infection of marbled crayfish juveniles using two *A. astaci* zoospore concentrations (7500 and 15000 zoospore/ml) on (A) total **length** gain (total growth), and (B) rate of **length** increment (rate of growth). Significant differences in panel A are marked with different letters, errorbars represent 95% confidence intervals (CIs) around the mean.



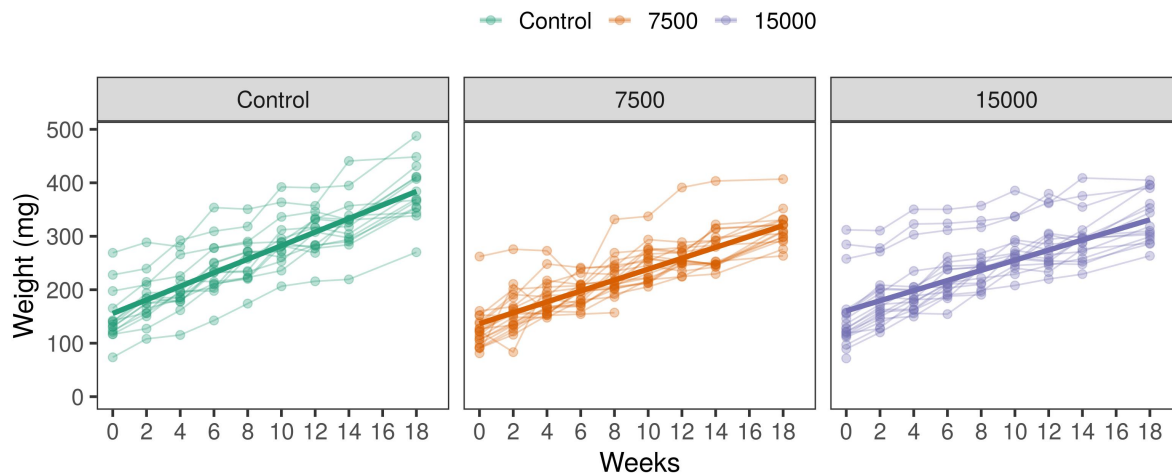

(a) Prediction based on fixed effects

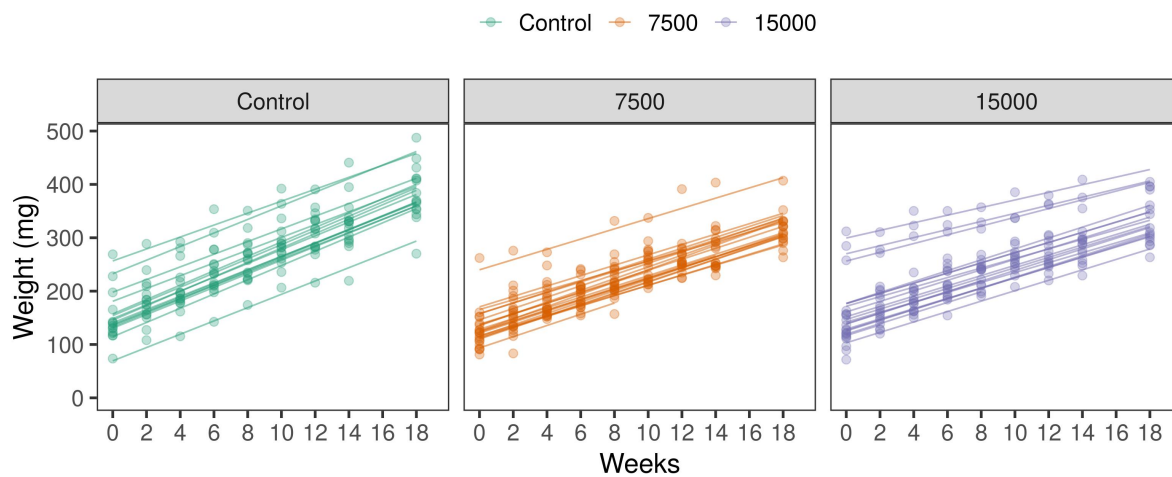

(b) Prediction based on fixed and random effects

Figure S4.2: Measured temporal trajectories of **weight** in Experiment 1 and predicted trajectories by final MLM model (Model 3A).

Table S4.2: MLM model selection procedure for response variable **weight** in Experiment 1 (A). Summary statistics for final Model 3A: (B) Analysis of deviance, (C) Analysis of variance, and (D) Summary statistics of random and fixed effects.

Model selection

A

|                                                               | npar | AIC    | BIC    | logLik  | deviance | Chisq    | Df | Pr(>Chisq)    |
|---------------------------------------------------------------|------|--------|--------|---------|----------|----------|----|---------------|
| Model 1                                                       | 3    | 5278.2 | 5290.6 | -2636.1 | 5272.2   |          |    |               |
| Model 2                                                       | 6    | 4273.7 | 4298.5 | -2130.8 | 4261.7   | 1010.528 | 3  | < 2.2e-16 *** |
| Model 3                                                       | 10   | 4239.2 | 4280.6 | -2109.6 | 4219.2   | 42.533   | 4  | 1.294e-08 *** |
| ---                                                           |      |        |        |         |          |          |    |               |
| Signif. codes: 0 '***' 0.001 '**' 0.01 '*' 0.05 '.' 0.1 ' ' 1 |      |        |        |         |          |          |    |               |

Model 3

B Analysis of Deviance Table (Type III Wald chisquare tests)  
Response: WEIGHT

|                                                               | Chisq    | Df | Pr(>Chisq)    |
|---------------------------------------------------------------|----------|----|---------------|
| (Intercept)                                                   | 168.990  | 1  | < 2.2e-16 *** |
| time                                                          | 1144.595 | 1  | < 2.2e-16 *** |
| plague                                                        | 2.911    | 2  | 0.2333        |
| time:plague                                                   | 42.361   | 2  | 6.33e-10 ***  |
| ---                                                           |          |    |               |
| Signif. codes: 0 '***' 0.001 '**' 0.01 '*' 0.05 '.' 0.1 ' ' 1 |          |    |               |

C Type III Analysis of Variance Table with Satterthwaite's method

|                                                               | Sum Sq | Mean Sq | NumDF | DenDF  | F value   | Pr(>F)        |
|---------------------------------------------------------------|--------|---------|-------|--------|-----------|---------------|
| time                                                          | 870413 | 870413  | 1     | 51.152 | 2773.8720 | < 2.2e-16 *** |
| plague                                                        | 913    | 457     | 2     | 54.626 | 1.4555    | 0.2422        |
| time:plague                                                   | 13293  | 6646    | 2     | 51.200 | 21.1806   | 1.983e-07 *** |
| ---                                                           |        |         |       |        |           |               |
| Signif. codes: 0 '***' 0.001 '**' 0.01 '*' 0.05 '.' 0.1 ' ' 1 |        |         |       |        |           |               |

Model 3

D Summary statistics of random and fixed effects

|                                                               | AIC         | BIC        | logLik   | deviance | df.resid     |
|---------------------------------------------------------------|-------------|------------|----------|----------|--------------|
|                                                               | 4239.2      | 4280.6     | -2109.6  | 4219.2   | 454          |
| Random effects:                                               |             |            |          |          |              |
| Groups                                                        | Name        | Variance   | Std.Dev. | Corr     |              |
| -----                                                         |             |            |          |          |              |
| id                                                            | (Intercept) | 2039.9655  | 45.1660  |          |              |
|                                                               | time        | 0.9672     | 0.9835   | -0.58    |              |
| Residual                                                      |             | 313.7900   | 17.7141  |          |              |
| Number of obs: 464, groups: id, 55                            |             |            |          |          |              |
| Fixed effects:                                                |             |            |          |          |              |
|                                                               | Estimate    | Std. Error | df       | t value  | Pr(> t )     |
| -----                                                         |             |            |          |          |              |
| (Intercept)                                                   | 155.6996    | 11.9772    | 54.3607  | 13.000   | < 2e-16 ***  |
| time                                                          | 12.6766     | 0.3747     | 48.6045  | 33.832   | < 2e-16 ***  |
| plague7500                                                    | -19.1193    | 15.8488    | 54.4204  | -1.206   | 0.233        |
| plague15000                                                   | 4.8047      | 15.8674    | 54.6597  | 0.303    | 0.763        |
| time:plague7500                                               | -2.4865     | 0.5039     | 50.1858  | -4.934   | 9.25e-06 *** |
| time:plague15000                                              | -3.2045     | 0.5133     | 50.6980  | -6.243   | 8.71e-08 *** |
| ---                                                           |             |            |          |          |              |
| 14                                                            |             |            |          |          |              |
| Signif. codes: 0 '***' 0.001 '**' 0.01 '*' 0.05 '.' 0.1 ' ' 1 |             |            |          |          |              |

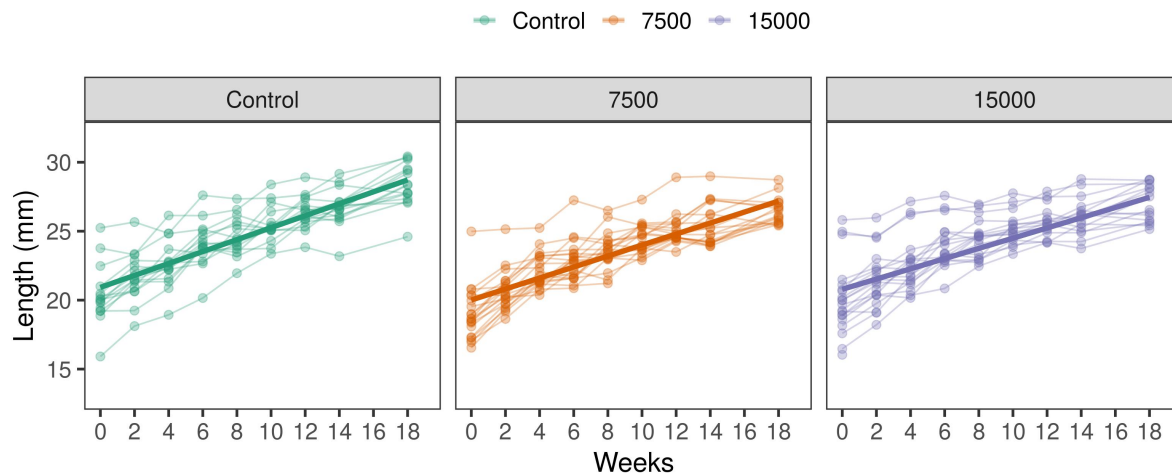

(a) Prediction based on fixed effects

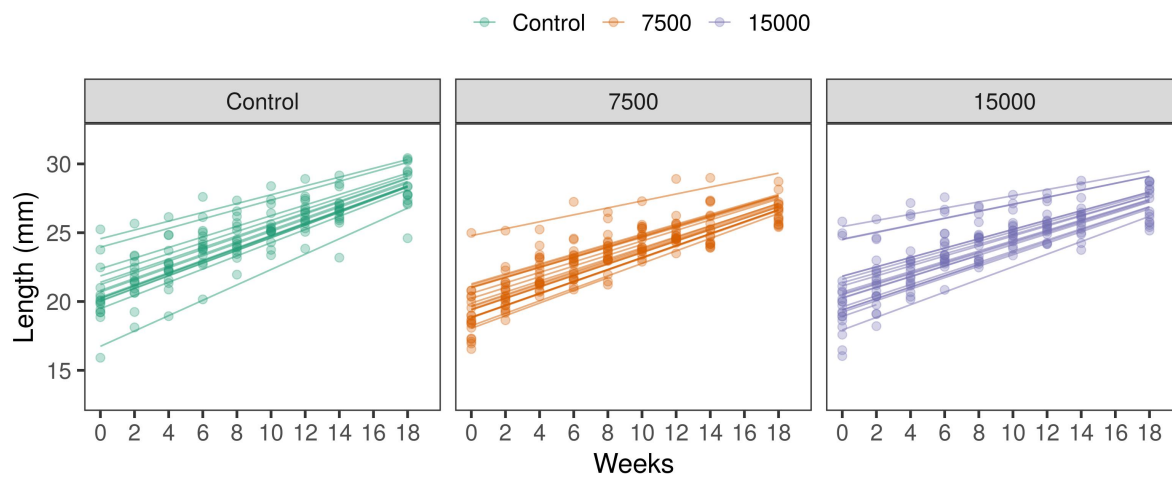

(b) Prediction based on fixed and random effects

Figure S4.3: Measured temporal trajectories of **length** in Experiment 1 and predicted trajectories by final MLM model (Model 3A).

Table S4.3: MLM model selection procedure for response variable **length** in Experiment 1 (A). Summary statistics for final Model 3A: (B) Analysis of deviance, (C) Analysis of variance, and (D) Summary statistics of random and fixed effects.

## Model selection

**A**

|                                                               | npar | AIC    | BIC    | logLik   | deviance | Chisq   | Df | Pr(>Chisq)    |
|---------------------------------------------------------------|------|--------|--------|----------|----------|---------|----|---------------|
| -----                                                         |      |        |        |          |          |         |    |               |
| Model 1                                                       | 3    | 2226.0 | 2238.4 | -1109.98 | 2220.0   |         |    |               |
| Model 2                                                       | 6    | 1331.4 | 1356.2 | -659.69  | 1319.4   | 900.581 | 3  | < 2.2e-16 *** |
| Model 3                                                       | 10   | 1312.1 | 1353.5 | -646.06  | 1292.1   | 27.261  | 4  | 1.761e-05 *** |
| ---                                                           |      |        |        |          |          |         |    |               |
| Signif. codes: 0 '***' 0.001 '**' 0.01 '*' 0.05 '.' 0.1 ' ' 1 |      |        |        |          |          |         |    |               |

## Model 3

### B Analysis of Deviance Table (Type III Wald chisquare tests)

Response: LENGTH

|                                                               | Chisq     | Df | Pr(>Chisq)  |
|---------------------------------------------------------------|-----------|----|-------------|
| -----                                                         |           |    |             |
| (Intercept)                                                   | 1803.4992 | 1  | < 2e-16 *** |
| time                                                          | 496.8330  | 1  | < 2e-16 *** |
| plague                                                        | 2.4881    | 2  | 0.28821     |
| time:plague                                                   | 5.7136    | 2  | 0.05745 .   |
| ---                                                           |           |    |             |
| Signif. codes: 0 '***' 0.001 '**' 0.01 '*' 0.05 '.' 0.1 ' ' 1 |           |    |             |

### C Type III Analysis of Variance Table with Satterthwaite's method

|                                                               | Sum Sq | Mean Sq | NumDF | DenDF  | F value   | Pr(>F)     |
|---------------------------------------------------------------|--------|---------|-------|--------|-----------|------------|
| -----                                                         |        |         |       |        |           |            |
| time                                                          | 944.74 | 944.74  | 1     | 51.403 | 1483.9887 | <2e-16 *** |
| plague                                                        | 1.58   | 0.79    | 2     | 54.135 | 1.2441    | 0.2963     |
| time:plague                                                   | 3.64   | 1.82    | 2     | 51.486 | 2.8568    | 0.0666 .   |
| ---                                                           |        |         |       |        |           |            |
| Signif. codes: 0 '***' 0.001 '**' 0.01 '*' 0.05 '.' 0.1 ' ' 1 |        |         |       |        |           |            |

## Model 3

### D Summary statistics of random and fixed effects

| AIC    | BIC    | logLik | deviance | df.resid |
|--------|--------|--------|----------|----------|
| 1312.1 | 1353.5 | -646.1 | 1292.1   | 454      |

#### Random effects:

| Groups                             | Name        | Variance | Std.Dev. | Corr  |
|------------------------------------|-------------|----------|----------|-------|
| -----                              |             |          |          |       |
| id                                 | (Intercept) | 3.415762 | 1.84818  |       |
|                                    | time        | 0.003349 | 0.05787  | -0.99 |
|                                    | Residual    | 0.636623 | 0.79789  |       |
| Number of obs: 464, groups: id, 55 |             |          |          |       |

#### Fixed effects:

|                                                               | Estimate | Std. Error | df       | t value | Pr(> t )   |
|---------------------------------------------------------------|----------|------------|----------|---------|------------|
| -----                                                         |          |            |          |         |            |
| (Intercept)                                                   | 20.92779 | 0.49279    | 53.85014 | 42.468  | <2e-16 *** |
| time                                                          | 0.43296  | 0.01942    | 49.16704 | 22.290  | <2e-16 *** |
| plague7500                                                    | -0.91635 | 0.65206    | 53.90166 | -1.405  | 0.1657     |
| plague15000                                                   | -0.13912 | 0.65298    | 54.18311 | -0.213  | 0.8321     |
| time:plague7500                                               | -0.03434 | 0.02590    | 50.35920 | -1.325  | 0.1910     |
| time:plague15000                                              | -0.06234 | 0.02608    | 51.17560 | -2.390  | 0.0206 *   |
| ---                                                           |          |            |          |         |            |
| Signif. codes: 0 '***' 0.001 '**' 0.01 '*' 0.05 '.' 0.1 ' ' 1 |          |            |          |         |            |

134 **S5 Statistical support for EXPERIMENT 2**

Table S5.1: Descriptive statistics (panels A/B), results of robust ANOVA (C/E), and post-hoc testing (D/F) for response variables in Experiment 2: **weight/length**.

### Descriptive statistics

#### A Response: WEIGHT (mg)

|               | N  | dead | alive | min   | max   | range | median | mean  | SE   | CI(95%) | var    | std  | coef.var |
|---------------|----|------|-------|-------|-------|-------|--------|-------|------|---------|--------|------|----------|
| 5x wk:Control | 15 | 0    | 15    | 197.6 | 347.8 | 150.2 | 312.1  | 300.4 | 10.4 | 22.3    | 1620.1 | 40.3 | 0.1      |
| 1x wk:Control | 15 | 0    | 15    | -8.2  | 84.9  | 93.1  | 36.7   | 28.8  | 7.1  | 15.3    | 760.5  | 27.6 | 1.0      |
| 5x wk:15000   | 15 | 4    | 11    | 91.2  | 288.2 | 197.0 | 211.2  | 204.2 | 16.6 | 36.9    | 3022.4 | 55.0 | 0.3      |
| 1x wk:15000   | 15 | 8    | 7     | -20.8 | 14.4  | 35.2  | -1.6   | -2.1  | 5.0  | 12.3    | 177.1  | 13.3 | -6.3     |

#### B Response: LENGTH (mm)

|               | N  | dead | alive | min   | max  | range | median | mean | SE   | CI(95%) | var  | std  | coef.var |
|---------------|----|------|-------|-------|------|-------|--------|------|------|---------|------|------|----------|
| 5x wk:Control | 15 | 0    | 15    | 3.90  | 9.96 | 6.05  | 8.14   | 7.76 | 0.44 | 0.93    | 2.85 | 1.69 | 0.22     |
| 1x wk:Control | 15 | 0    | 15    | -0.20 | 3.15 | 3.35  | 1.20   | 1.20 | 0.22 | 0.47    | 0.72 | 0.85 | 0.71     |
| 5x wk:15000   | 15 | 4    | 11    | 1.99  | 8.26 | 6.27  | 5.13   | 5.13 | 0.48 | 1.06    | 2.51 | 1.58 | 0.31     |
| 1x wk:15000   | 15 | 8    | 7     | -0.75 | 1.42 | 2.17  | 0.56   | 0.39 | 0.29 | 0.70    | 0.57 | 0.75 | 1.91     |

### Robust ANOVA

A heteroscedastic two-way ANOVA based on trimmed means (20% trimming level)

Mair & Wilcox (2020); Wilcox (2012)

### Robust post-hoc tests

Inference for all pairwise comparisons

Hochberg metod was used to correct the p-value

Mair & Wilcox (2020); Wilcox (2012)

#### C Response: WEIGHT (mg)

|             | Q.value  | p.value |
|-------------|----------|---------|
| Food        | 652.2240 | 0.001   |
| Plague      | 44.5496  | 0.001   |
| Plague:Food | 11.9241  | 0.003   |

#### D Response: WEIGHT (mg)

|                                 | psihat     | ci.lower   | ci.upper   | p.value |
|---------------------------------|------------|------------|------------|---------|
| 5x wk:Control vs. 1x wk:Control | 279.11111  | 243.48656  | 314.73566  | 0.00000 |
| 5x wk:Control vs. 5x wk:15000   | 97.50159   | 46.61736   | 148.38581  | 0.00023 |
| 5x wk:Control vs. 1x wk:15000   | 310.12444  | 278.44186  | 341.80703  | 0.00000 |
| 1x wk:Control vs. 5x wk:15000   | -181.60952 | -233.11153 | -130.10752 | 0.00000 |
| 1x wk:Control vs. 1x wk:15000   | 31.01333   | -2.26759   | 64.29425   | 0.01384 |
| 5x wk:15000 vs. 1x wk:15000     | 212.62286  | 162.28366  | 262.96205  | 0.00000 |

#### E Response: LENGTH (mm)

|             | Q.value  | p.value |
|-------------|----------|---------|
| Food        | 251.9742 | 0.001   |
| Plague      | 24.9497  | 0.001   |
| Food:Plague | 8.3337   | 0.009   |

#### F Response: LENGTH (mm)

|                                 | psihat   | ci.lower | ci.upper | p.value |
|---------------------------------|----------|----------|----------|---------|
| 5x wk:Control vs. 1x wk:Control | 6.79288  | 5.03517  | 8.55059  | 0.00000 |
| 5x wk:Control vs. 5x wk:15000   | 2.85387  | 0.94539  | 4.76234  | 0.00103 |
| 5x wk:Control vs. 1x wk:15000   | 7.55621  | 5.68658  | 9.42583  | 0.00000 |
| 1x wk:Control vs. 5x wk:15000   | -3.93901 | -5.23985 | -2.63817 | 0.00001 |
| 1x wk:Control vs. 1x wk:15000   | 0.76333  | -0.49053 | 2.01719  | 0.07176 |
| 5x wk:15000 vs. 1x wk:15000     | 4.70234  | 3.20631  | 6.19837  | 0.00001 |

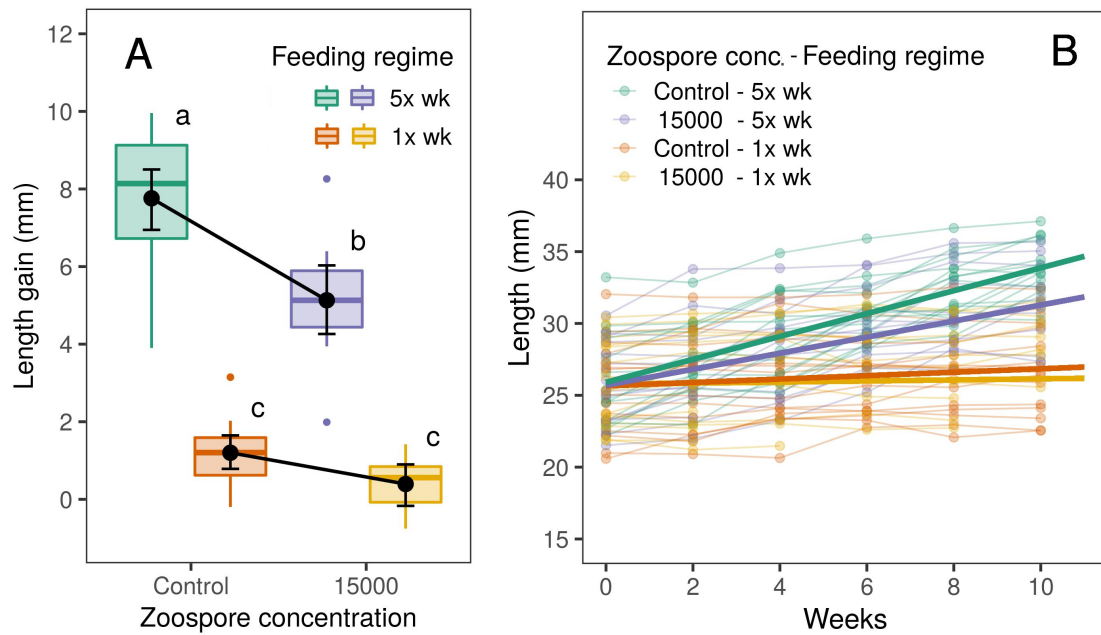

Figure S5.1: Effects of repeated infection of marbled crayfish juveniles with 15000 zoospore/ml of *A. astaci* under two feeding regimes (once a week and five times a week) on: A) total **length** gain, and B) rate of **length** increment. Significant differences in panel A are marked with different letters, errorbars represent 95% confidence intervals (CIs) around the mean.

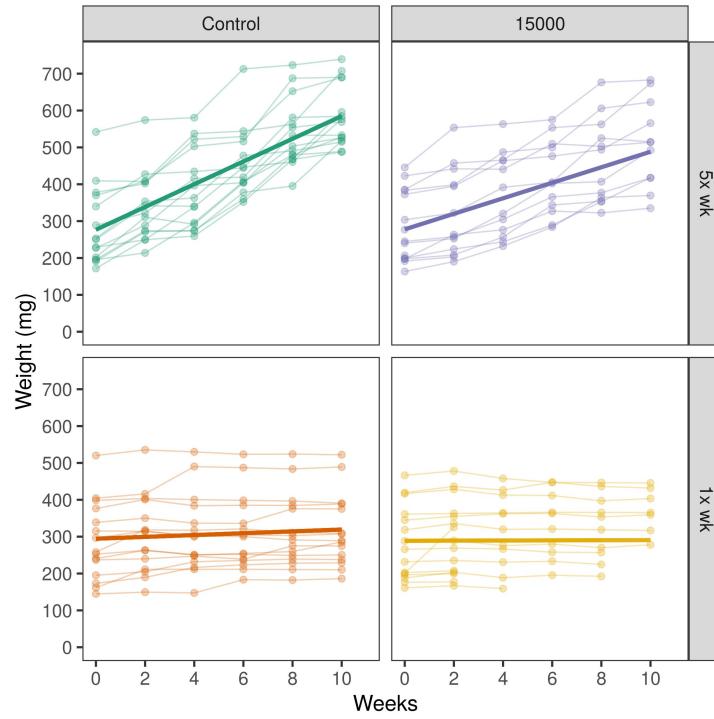

(a) Prediction based on fixed effects

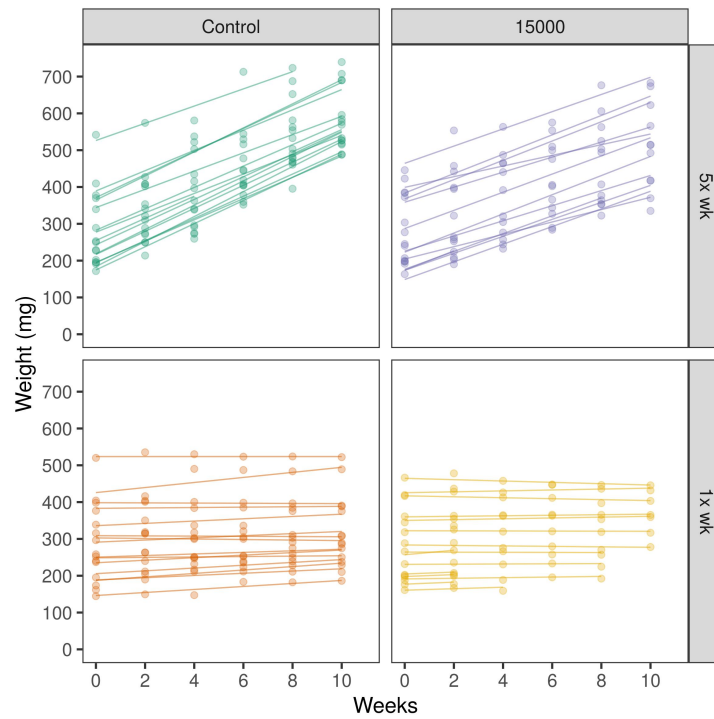

(b) Prediction based on fixed and random effects

Figure S5.2: Measured temporal trajectories of **weight** in Experiment 2 and predicted trajectories by final MLM model (Model 4).

Table S5.2: MLM model selection procedure for response variable **weight** in Experiment 2 (A). Summary statistics for final Model 4: (B) Analysis of deviance, (C) Analysis of variance, and (D) Summary statistics of random and fixed effects.

Model selection

A

|         | npars | AIC    | BIC    | logLik  | deviance | Chisq   | Df | Pr(>Chisq)    |
|---------|-------|--------|--------|---------|----------|---------|----|---------------|
| Model 1 | 3     | 3853.8 | 3865.1 | -1923.9 | 3847.8   |         |    |               |
| Model 2 | 6     | 3369.2 | 3391.9 | -1678.6 | 3357.2   | 490.575 | 3  | < 2.2e-16 *** |
| Model 3 | 8     | 3273.8 | 3304.0 | -1628.9 | 3257.8   | 99.439  | 2  | < 2.2e-16 *** |
| Model 4 | 12    | 3243.6 | 3288.9 | -1609.8 | 3219.6   | 38.179  | 4  | 1.029e-07 *** |

Signif. codes: 0 '\*\*\*' 0.001 '\*\*' 0.01 '\*' 0.05 '.' 0.1 ' ' 1

Model 4

B Analysis of Deviance Table (Type III Wald chisquare tests)

Response: WEIGHT

|                  |           | Chisq | Df        | Pr(>Chisq) |
|------------------|-----------|-------|-----------|------------|
| (Intercept)      | 117.0232  | 1     | < 2.2e-16 | ***        |
| time             | 1065.5573 | 1     | < 2.2e-16 | ***        |
| food             | 0.2386    | 1     | 0.625218  |            |
| plague           | 0.0008    | 1     | 0.977626  |            |
| time:food        | 450.3308  | 1     | < 2.2e-16 | ***        |
| time:plague      | 47.7715   | 1     | 4.789e-12 | ***        |
| food:plague      | 0.0166    | 1     | 0.897465  |            |
| time:food:plague | 13.1208   | 1     | 0.000292  | ***        |

Signif. codes: 0 '\*\*\*' 0.001 '\*\*' 0.01 '\*' 0.05 '.' 0.1 ' ' 1

C Type III Analysis of Variance Table with Satterthwaite's method

|                  | Sum Sq | Mean Sq | NumDF | DenDF  | F value  | Pr(>F)        |
|------------------|--------|---------|-------|--------|----------|---------------|
| time             | 355709 | 355709  | 1     | 56.129 | 698.1474 | < 2.2e-16 *** |
| food             | 161    | 161     | 1     | 60.086 | 0.3151   | 0.576641      |
| plague           | 4      | 4       | 1     | 60.086 | 0.0080   | 0.929223      |
| time:food        | 289393 | 289393  | 1     | 56.129 | 567.9893 | < 2.2e-16 *** |
| time:plague      | 17478  | 17478   | 1     | 56.129 | 34.3044  | 2.577e-07 *** |
| food:plague      | 8      | 8       | 1     | 60.086 | 0.0166   | 0.897896      |
| time:food:plague | 6685   | 6685    | 1     | 56.129 | 13.1208  | 0.000629 ***  |

Signif. codes: 0 '\*\*\*' 0.001 '\*\*' 0.01 '\*' 0.05 '.' 0.1 ' ' 1

Model 4

D Summary statistics of random and fixed effects

|  | AIC    | BIC    | logLik  | deviance | df.resid |
|--|--------|--------|---------|----------|----------|
|  | 3243.6 | 3288.9 | -1609.8 | 3219.6   | 310      |

Random effects:

| Groups   | Name        | Variance | Std.Dev. | Corr  |
|----------|-------------|----------|----------|-------|
| id       | (Intercept) | 9550.866 | 97.729   |       |
|          | time        | 6.093    | 2.468    | -0.37 |
| Residual |             | 509.505  | 22.572   |       |

Number of obs: 322, groups: id, 60

Fixed effects:

|                           | Estimate | Std. Error | df      | t value | Pr(> t )     |
|---------------------------|----------|------------|---------|---------|--------------|
| (Intercept)               | 276.7607 | 25.5840    | 59.8902 | 10.818  | 1.03e-15 *** |
| time                      | 30.8298  | 0.9445     | 50.9893 | 32.643  | < 2e-16 ***  |
| food1xwk                  | 17.6732  | 36.1809    | 59.8880 | 0.488   | 0.627002     |
| plague15000               | 1.0157   | 36.2156    | 60.1139 | 0.028   | 0.977719     |
| time:food1xwk             | -28.3397 | 1.3355     | 50.9577 | -21.221 | < 2e-16 ***  |
| time:plague15000          | -9.7848  | 1.4157     | 53.1784 | -6.912  | 6.16e-09 *** |
| food1xwk:plague15000      | -6.5991  | 51.2102    | 60.0855 | -0.129  | 0.897896     |
| time:food1xwk:plague15000 | 7.4780   | 2.0645     | 56.1286 | 3.622   | 0.000629 *** |

20

Signif. codes: 0 '\*\*\*' 0.001 '\*\*' 0.01 '\*' 0.05 '.' 0.1 ' ' 1



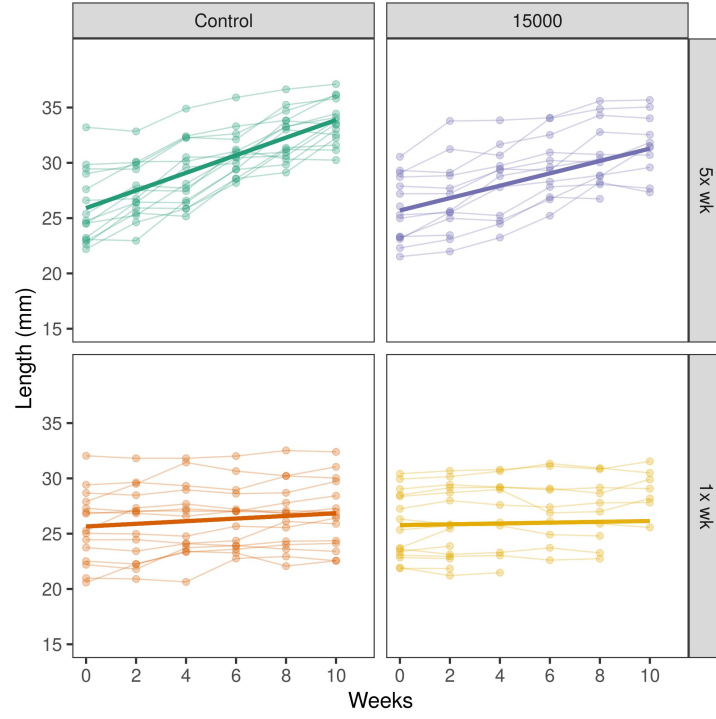

(a) Prediction based on fixed effects

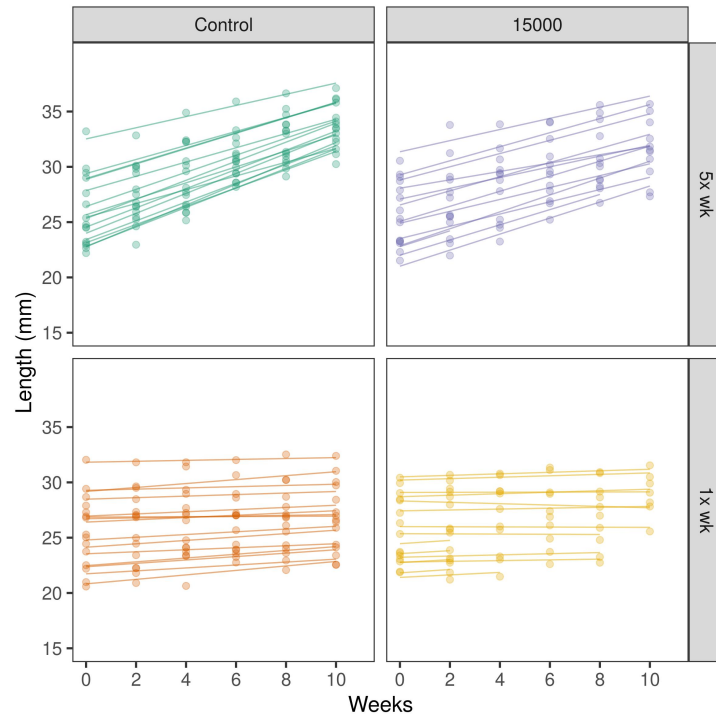

(b) Prediction based on fixed and random effects

Figure S5.3: Measured temporal trajectories of **length** in Experiment 2 and predicted trajectories by final MLM model (Model 4).

Table S5.3: MLM model selection procedure for response variable **length** in Experiment 2 (A). Summary statistics for final Model 4: (B) Analysis of deviance, (C) Analysis of variance, and (D) Summary statistics of random and fixed effects.

## Model selection

**A**

|                                                               | npars | AIC    | BIC    | logLik  | deviance | Chisq   | Df | Pr(>Chisq)    |
|---------------------------------------------------------------|-------|--------|--------|---------|----------|---------|----|---------------|
| -----                                                         |       |        |        |         |          |         |    |               |
| Model 1                                                       | 3     | 1535.9 | 1547.2 | -764.95 | 1529.90  |         |    |               |
| Model 2                                                       | 6     | 1118.8 | 1141.5 | -553.40 | 1106.80  | 423.097 | 3  | < 2.2e-16 *** |
| Model 3                                                       | 8     | 1029.1 | 1059.3 | -506.56 | 1013.12  | 93.687  | 2  | < 2.2e-16 *** |
| Model 4                                                       | 12    | 1007.5 | 1052.8 | -491.74 | 983.47   | 29.646  | 4  | 5.779e-06 *** |
| ---                                                           |       |        |        |         |          |         |    |               |
| Signif. codes: 0 '***' 0.001 '**' 0.01 '*' 0.05 '.' 0.1 ' ' 1 |       |        |        |         |          |         |    |               |

## Model 4

### B Analysis of Deviance Table (Type III Wald chisquare tests)

Response: LENGTH (mm)

|                                                               | Chisq     | Df | Pr(>Chisq)    |
|---------------------------------------------------------------|-----------|----|---------------|
| -----                                                         |           |    |               |
| (Intercept)                                                   | 1095.7032 | 1  | < 2.2e-16 *** |
| time                                                          | 613.7170  | 1  | < 2.2e-16 *** |
| food                                                          | 0.0543    | 1  | 0.81580       |
| plague                                                        | 0.0383    | 1  | 0.84484       |
| time:food                                                     | 221.8144  | 1  | < 2.2e-16 *** |
| time:plague                                                   | 24.7473   | 1  | 6.536e-07 *** |
| food:plague                                                   | 0.0463    | 1  | 0.82969       |
| time:food:plague                                              | 5.0367    | 1  | 0.02482 *     |
| ---                                                           |           |    |               |
| Signif. codes: 0 '***' 0.001 '**' 0.01 '*' 0.05 '.' 0.1 ' ' 1 |           |    |               |

### C Type III Analysis of Variance Table with Satterthwaite's method

|                                                               | Sum Sq  | Mean Sq | NumDF | DenDF  | F value  | Pr(>F)        |
|---------------------------------------------------------------|---------|---------|-------|--------|----------|---------------|
| -----                                                         |         |         |       |        |          |               |
| time                                                          | 236.777 | 236.777 | 1     | 59.136 | 477.4969 | < 2.2e-16 *** |
| food                                                          | 0.006   | 0.006   | 1     | 60.066 | 0.0130   | 0.90958       |
| plague                                                        | 0.002   | 0.002   | 1     | 60.066 | 0.0038   | 0.95100       |
| time:food                                                     | 148.793 | 148.793 | 1     | 59.136 | 300.0635 | < 2.2e-16 *** |
| time:plague                                                   | 10.536  | 10.536  | 1     | 59.136 | 21.2470  | 2.205e-05 *** |
| food:plague                                                   | 0.023   | 0.023   | 1     | 60.066 | 0.0463   | 0.83041       |
| time:food:plague                                              | 2.498   | 2.498   | 1     | 59.136 | 5.0367   | 0.02857 *     |
| ---                                                           |         |         |       |        |          |               |
| Signif. codes: 0 '***' 0.001 '**' 0.01 '*' 0.05 '.' 0.1 ' ' 1 |         |         |       |        |          |               |

## Model 4

### D Summary statistics of random and fixed effects

|        |        |        |          |          |
|--------|--------|--------|----------|----------|
| AIC    | BIC    | logLik | deviance | df.resid |
| 1007.5 | 1052.8 | -491.7 | 983.5    | 311      |

#### Random effects:

| Groups                             | Name        | Variance | Std.Dev. | Corr  |
|------------------------------------|-------------|----------|----------|-------|
| -----                              |             |          |          |       |
| id                                 | (Intercept) | 8.930896 | 2.98846  |       |
|                                    | time        | 0.008413 | 0.09172  | -0.63 |
| Residual                           |             | 0.495870 | 0.70418  |       |
| Number of obs: 323, groups: id, 60 |             |          |          |       |

#### Fixed effects:

|                                                               | Estimate | Std. Error | df       | t value | Pr(> t )     |
|---------------------------------------------------------------|----------|------------|----------|---------|--------------|
| -----                                                         |          |            |          |         |              |
| (Intercept)                                                   | 25.91037 | 0.78276    | 59.85996 | 33.101  | < 2e-16 ***  |
| time                                                          | 0.79626  | 0.03214    | 52.68150 | 24.773  | < 2e-16 ***  |
| food1xwk                                                      | -0.25788 | 1.10699    | 59.85996 | -0.233  | 0.8166       |
| plague15000                                                   | -0.21686 | 1.10809    | 60.09446 | -0.196  | 0.8455       |
| time:food1xwk                                                 | -0.67699 | 0.04546    | 52.68150 | -14.893 | < 2e-16 ***  |
| time:plague15000                                              | -0.23713 | 0.04767    | 56.05708 | -4.975  | 6.55e-06 *** |
| food1xwk:plague15000                                          | 0.33704  | 1.56688    | 60.06642 | 0.215   | 0.8304       |
| time:food1xwk:plague15000                                     | 0.15530  | 0.06920    | 59.13558 | 2.244   | 0.0286 *     |
| ---                                                           |          |            |          |         |              |
| Signif. codes: 0 '***' 0.001 '**' 0.01 '*' 0.05 '.' 0.1 ' ' 1 |          |            |          |         |              |

Table S5.4: Summary statistics for expression level ( $\log_2$  (Fold change)) of CS, GAPDH, C/EBP- $\beta$  and ProPO genes.

### CS

#### A Kruskal-Wallis rank sum test

Kruskal-Wallis chi-squared = 15.343  
df = 3  
p-value = 0.001546

#### B Dunn (1964) Kruskal-Wallis multiple comparison p-values adjusted with the Holm method.

|   | Comparison            | Z          | P.unadj     | P.adj       |
|---|-----------------------|------------|-------------|-------------|
| 1 | 15000.1 - 15000.5     | -3.1002304 | 0.001933702 | 0.009668508 |
| 2 | 15000.1 - Control.1   | -1.0155927 | 0.309823373 | 0.619646747 |
| 3 | 15000.5 - Control.1   | 2.0846377  | 0.037102201 | 0.111306603 |
| 4 | 15000.1 - Control.5   | -3.2605872 | 0.001111818 | 0.006670908 |
| 5 | 15000.5 - Control.5   | -0.1603567 | 0.872600061 | 0.872600061 |
| 6 | Control.1 - Control.5 | -2.2449944 | 0.024768490 | 0.099073960 |

### GAPDH

#### C Kruskal-Wallis rank sum test

Kruskal-Wallis chi-squared = 9.72  
df = 3  
p-value = 0.0211

#### D Dunn (1964) Kruskal-Wallis multiple comparison p-values adjusted with the Holm method.

|   | Comparison            | Z           | P.unadj     | P.adj      |
|---|-----------------------|-------------|-------------|------------|
| 1 | 15000.1 - 15000.5     | -2.67261242 | 0.007526315 | 0.03763158 |
| 2 | 15000.1 - Control.1   | -1.76392420 | 0.077744742 | 0.31097897 |
| 3 | 15000.5 - Control.1   | 0.90868822  | 0.363514723 | 0.72702945 |
| 4 | 15000.1 - Control.5   | -2.72606467 | 0.006409444 | 0.03845666 |
| 5 | 15000.5 - Control.5   | -0.05345225 | 0.957371576 | 0.95737158 |
| 6 | Control.1 - Control.5 | -0.96214047 | 0.335979047 | 1.00000000 |

### EBP1

#### E Kruskal-Wallis rank sum test

Kruskal-Wallis chi-squared = 14.543  
df = 3  
p-value = 0.002252

#### F Dunn (1964) Kruskal-Wallis multiple comparison p-values adjusted with the Holm method.

|   | Comparison            | Z         | P.unadj     | P.adj       |
|---|-----------------------|-----------|-------------|-------------|
| 1 | 15000.1 - 15000.5     | 3.260587  | 0.001111818 | 0.006670908 |
| 2 | 15000.1 - Control.1   | 0.641427  | 0.521245308 | 1.00000000  |
| 3 | 15000.5 - Control.1   | -2.619160 | 0.008814655 | 0.035258620 |
| 4 | 15000.1 - Control.5   | 2.619160  | 0.008814655 | 0.044073275 |
| 5 | 15000.5 - Control.5   | -0.641427 | 0.521245308 | 0.521245308 |
| 6 | Control.1 - Control.5 | 1.977733  | 0.047958814 | 0.143876442 |

### ProPO

#### G Kruskal-Wallis rank sum test

Kruskal-Wallis chi-squared = 3.2971  
df = 3  
p-value = 0.348

Table S5.5: Fisher's exact test (A) and pairwise post-hoc comparisons (B) for the proportion of dead crayfish at the end of Experiment 2.

**Mortality**

**A Fisher's Exact Test for Count Data**

Alternative hypothesis: two.sided  
p = 0.0002387243

**B Pairwise Fisher test**

|   | group1 | group2 | n  | p      | p.adj  | p.adj.signif |
|---|--------|--------|----|--------|--------|--------------|
| 1 | 1500-1 | 1500-5 | 30 | 0.264  | 0.528  | ns           |
| 2 | 1500-1 | cont-1 | 30 | 0.0022 | 0.0132 | *            |
| 3 | 1500-1 | cont-5 | 30 | 0.0022 | 0.0132 | *            |
| 4 | 1500-5 | cont-1 | 30 | 0.0996 | 0.398  | ns           |
| 5 | 1500-5 | cont-5 | 30 | 0.0996 | 0.398  | ns           |
| 6 | cont-1 | cont-5 | 30 | 1      | 1      | ns           |

## References

- Bates, D., Mächler, M., Bolker, B., and Walker, S. (2015). Fitting linear mixed-effects models using *lme4*. *Journal of Statistical Software*, 67(1):1–48.
- Monsalves, M. J., Bangdiwala, A. S., Thabane, A., and Bangdiwala, S. I. (2020). LEVEL (Logical Explanations & Visualizations of Estimates in Linear mixed models): recommendations for reporting multilevel data and analyses. *BMC Medical Research Methodology*, 20(1):1–9.
- Oidtmann, B., Geiger, S., Steinbauer, P., Culas, A., and Hoffmann, R. W. (2006). Detection of *Aphanomyces astaci* in North American crayfish by polymerase chain reaction. *Diseases of Aquatic Organisms*, 72(1):53–64.
- Peugh, J. L. (2010). A practical guide to multilevel modeling. *Journal of School Psychology*, 48(1):85–112.
